# Supplementary material for: Dihydroauroglaucin Isolated from the Mediterranean Sponge Grantia compressa Endophyte Marine Fungus Eurotium chevalieri Inhibits Migration of Human Neuroblastoma Cells
Source: MDPI journal article supplement (doi:10.3390/pharmaceutics14030616), 2022-03-11
Supplement: s1 [file s1]

# Supplementary Materials: Dihydroauroglaucin Isolated from the Mediterranean Sponge *Grantia compressa* Endophyte Marine Fungus *Eurotium chevalieri* Inhibits Migration of Human Neuroblastoma Cells

Marzia Vasarri, Giovanni Andrea Vitale, Giovanna Cristina Varese, Emanuela Barletta, Maria Valeria D'Auria, Donatella de Pascale and Donatella Degl'Innocenti

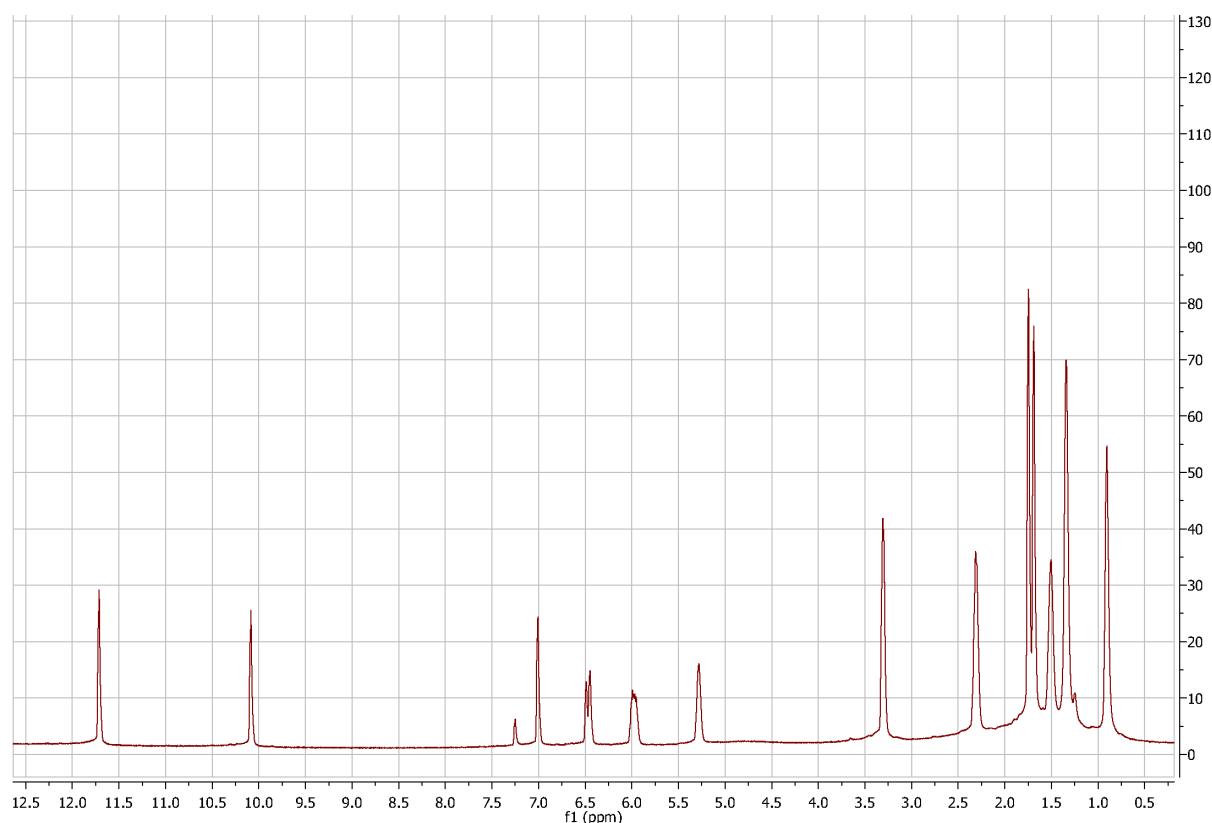

**Figure S1.**  $^1\text{H}$ -NMR spectrum of compound **5** ( $\text{CDCl}_3$ , 400 MHz).

F: FTMS + c ESI Full ms [150.00-2000.00]

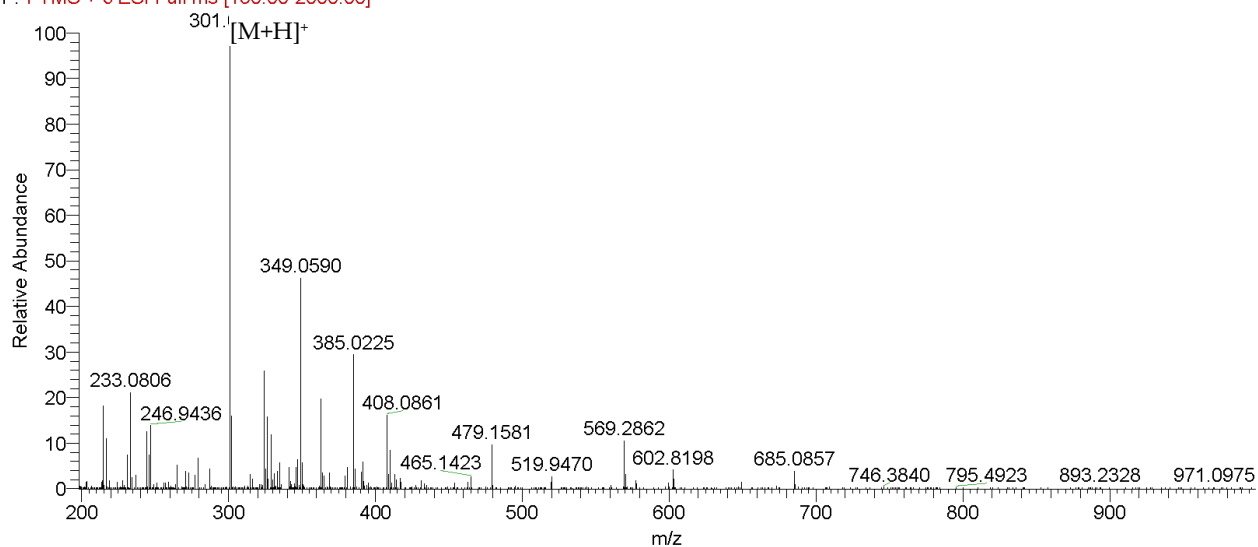

Figure S2. HRMS spectrum of compound 1.

F: FTMS + c ESI Full ms [150.00-2000.00]

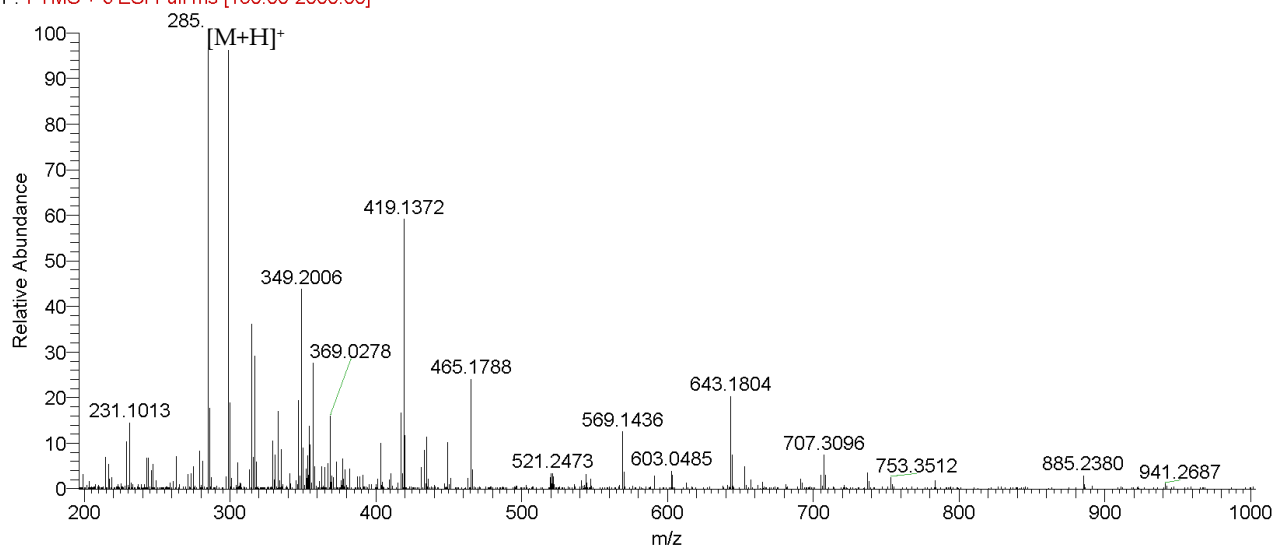

Figure S3. HRMS spectrum of compound 2.

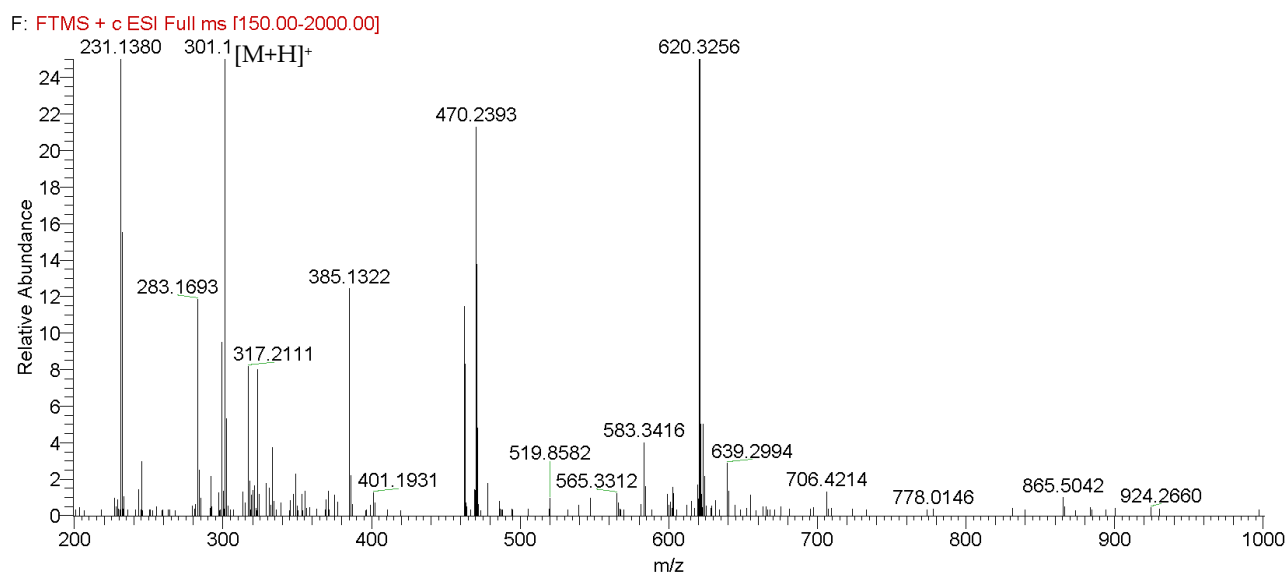

Figure S4. HRMS spectrum of compound 3.

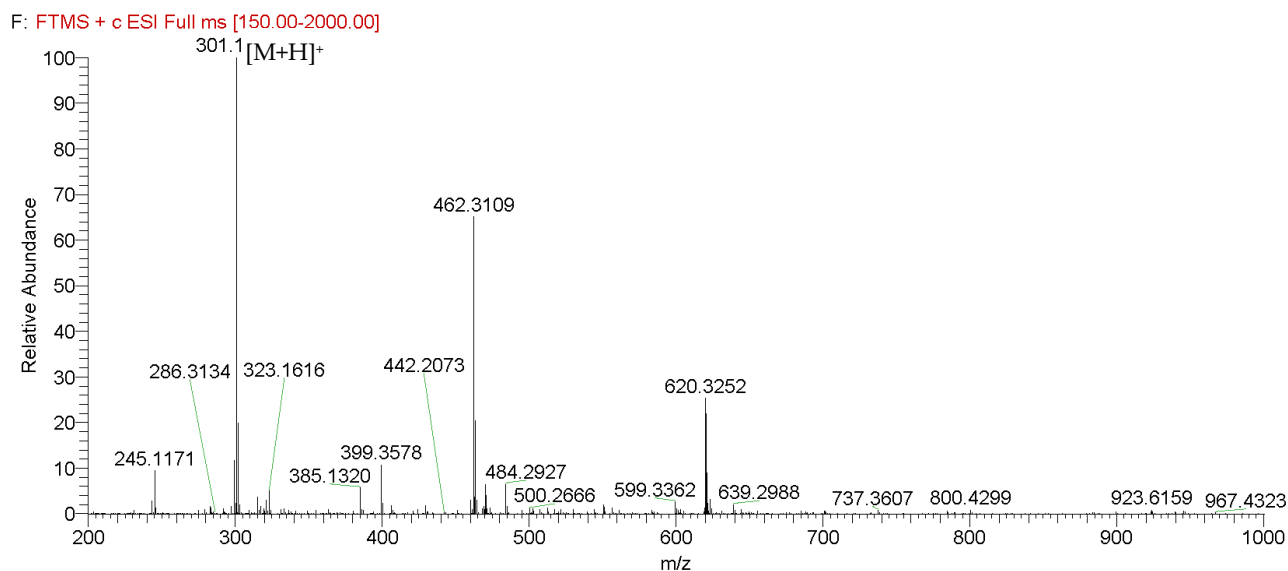

Figure S5. HRMS spectrum of compound 4.

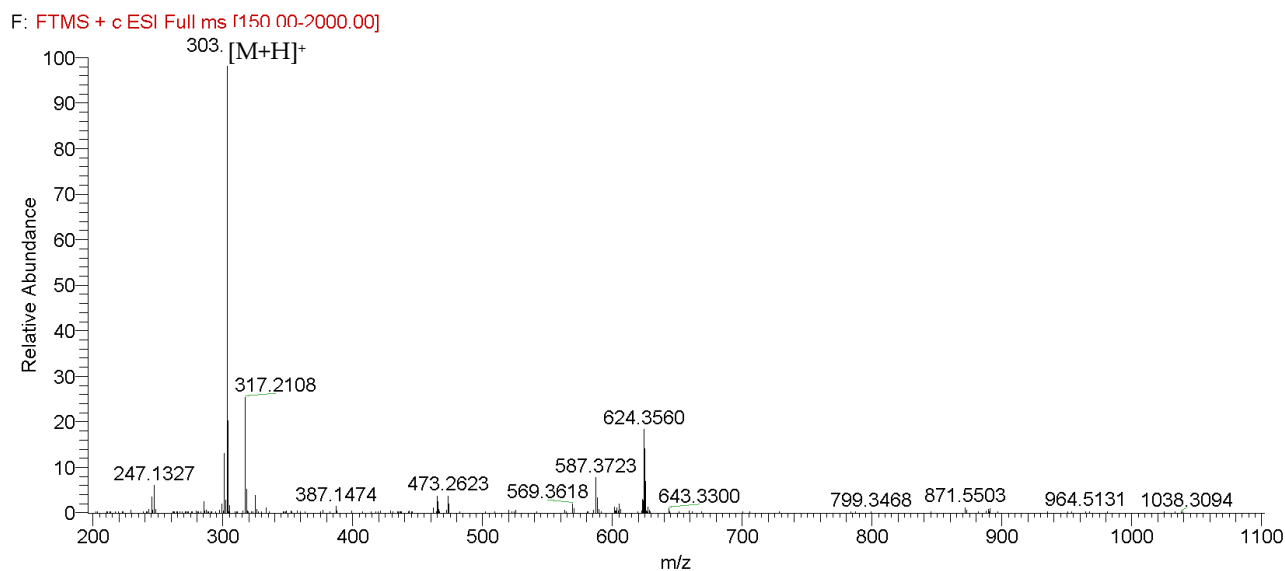

**Figure S6.** HRMS spectrum of compound 5.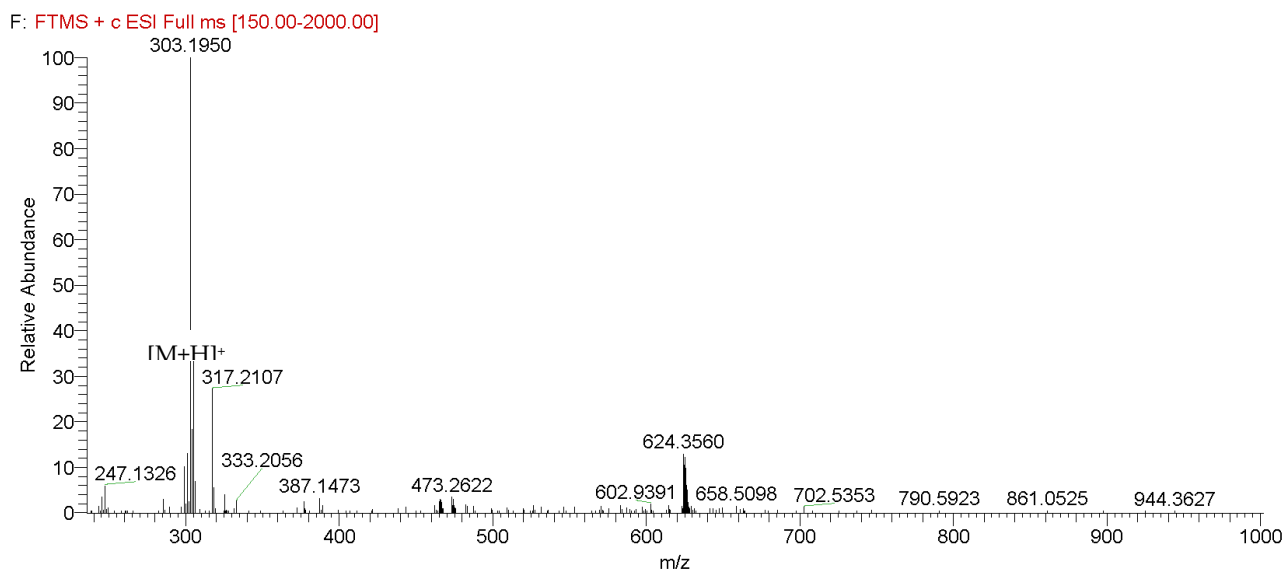**Figure S7.** HRMS spectrum of compound 6.
